# Supplementary material for: History of atmospheric SF 6 from 1973 to 2008
Source: Copernicus journal article supplement (doi:10.5194/acp-10-10305-2010), 2010-11-04
Supplement: Supplementary file 4 [file acp-10-10305-2010-supplement.zip]

| Region             | Emission rate (Gg/yr) |                      |
|--------------------|-----------------------|----------------------|
|                    | 2004–2004             | 2006–2008            |
| Africa             | $0.15^{0.10}_{0.21}$  | $0.19^{0.14}_{0.24}$ |
|                    | 0.13                  | 0.15                 |
| Asia, Non-UNFCCC   | $2.75^{2.47}_{3.03}$  | $4.11^{3.86}_{4.37}$ |
|                    | 1.95                  | 2.52                 |
| Asia, UNFCCC       | $0.15^{0.01}_{0.29}$  | $0.27^{0.13}_{0.40}$ |
|                    | 0.48                  | 0.45                 |
| Australasia        | $0.02^{0.01}_{0.03}$  | $0.02^{0.01}_{0.03}$ |
|                    | 0.02                  | 0.02                 |
| Europe, UNFCCC     | $0.75^{0.60}_{0.90}$  | $0.75^{0.62}_{0.89}$ |
|                    | 0.88                  | 1.05                 |
| Europe, non-UNFCCC | $0.02^{0.01}_{0.03}$  | $0.02^{0.01}_{0.03}$ |
|                    | 0.02                  | 0.02                 |
| North America      | $1.62^{1.36}_{1.88}$  | $1.48^{1.30}_{1.66}$ |
|                    | 1.88                  | 1.98                 |
| South America      | $0.11^{0.07}_{0.16}$  | $0.14^{0.10}_{0.19}$ |
|                    | 0.11                  | 0.12                 |

Aux. Table 1: Annual regional emissions. The first line for each region shows the optimized emissions and uncertainty ranges, and the second line shows EDGAR v4 and extrapolated emissions in each region.
