# Supplementary figures and images for: History of atmospheric SF 6 from 1973 to 2008
Source: Copernicus journal article supplement (doi:10.5194/acp-10-10305-2010), 2010-11-04

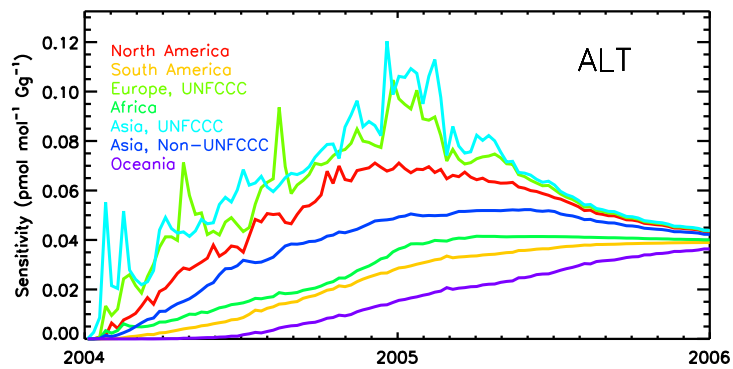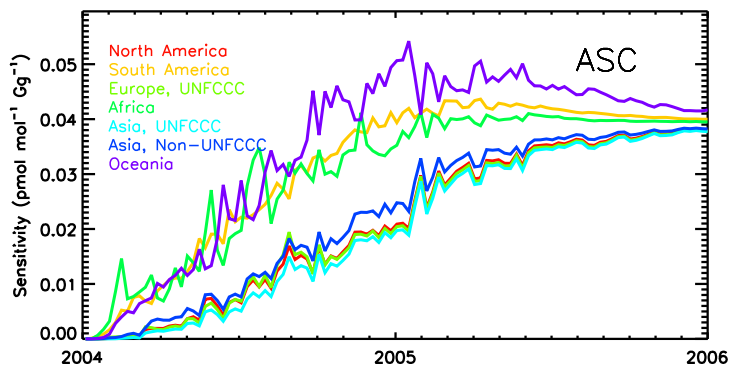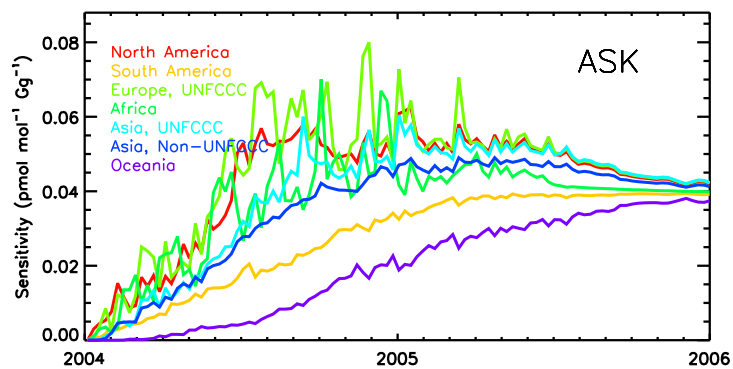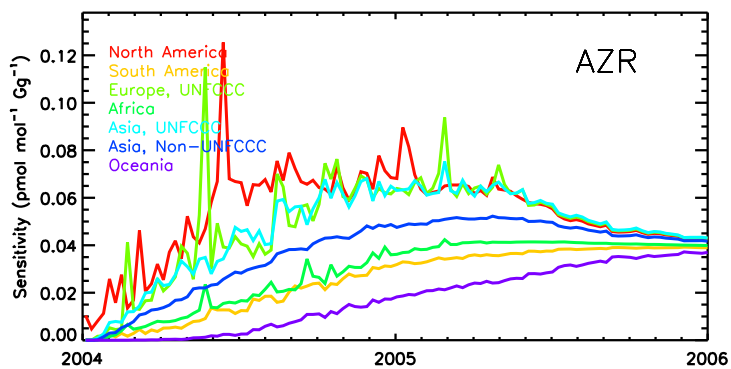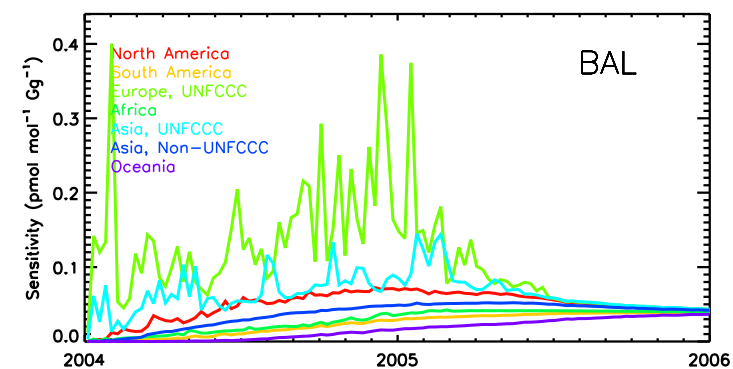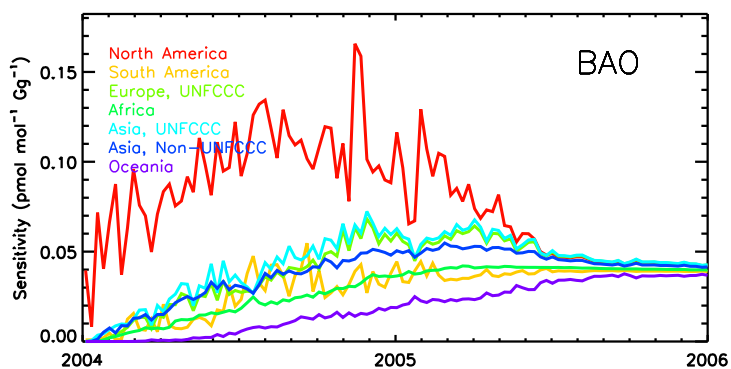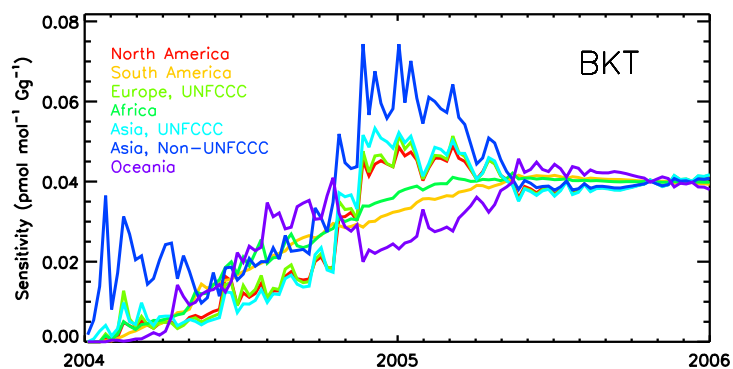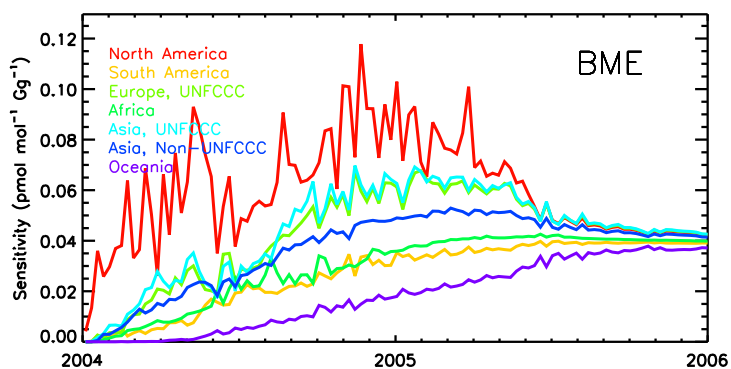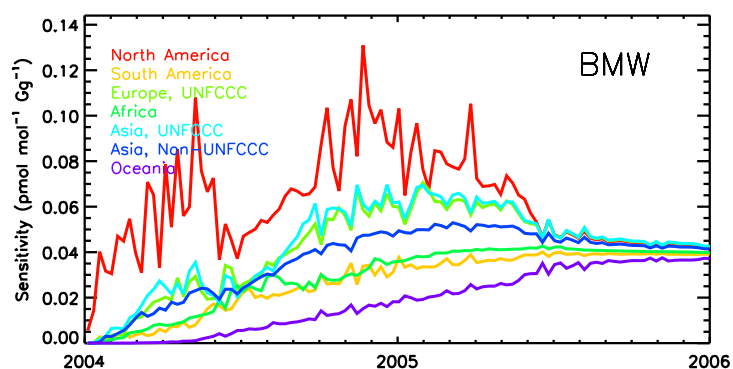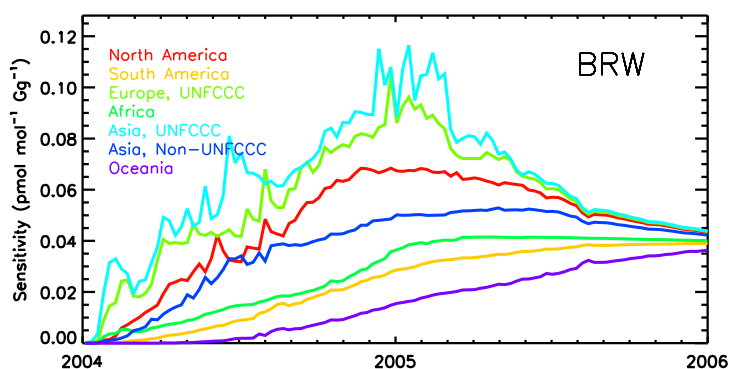

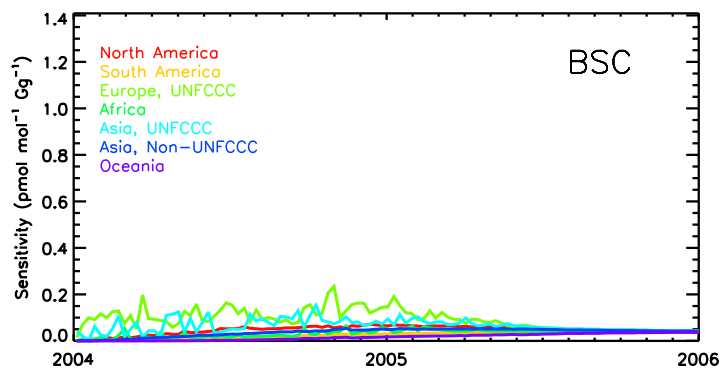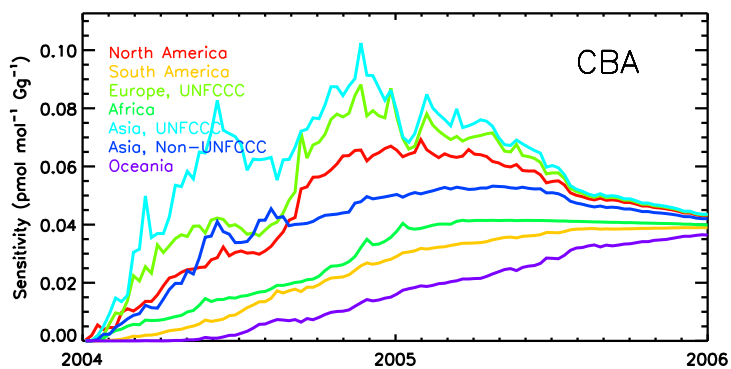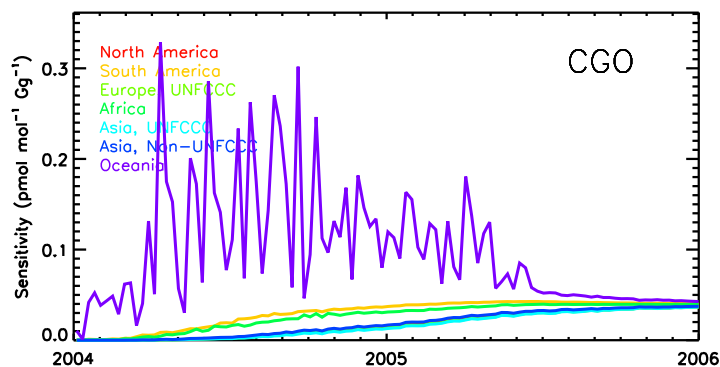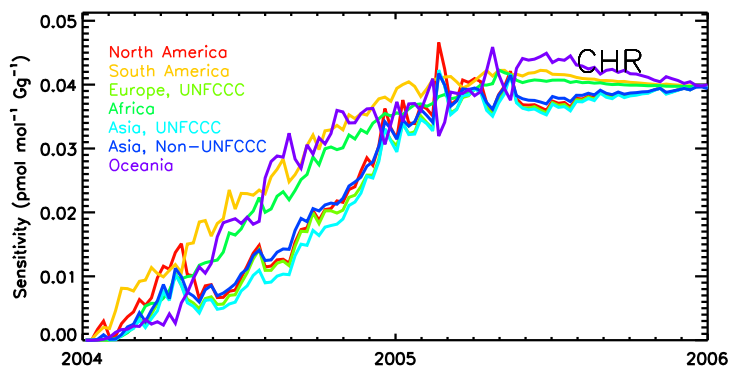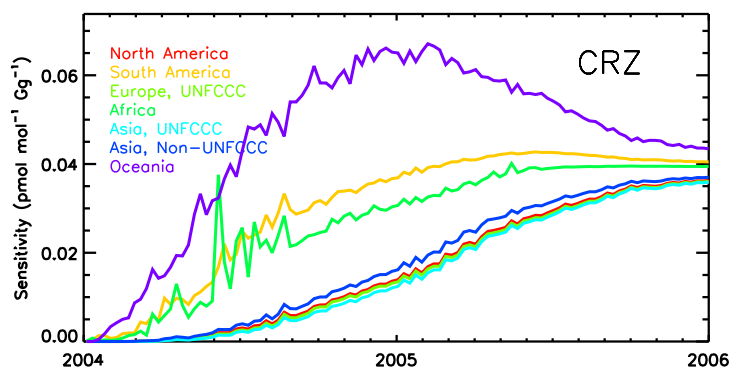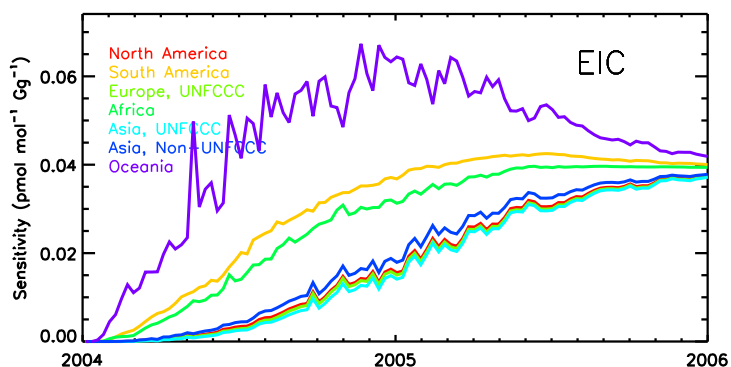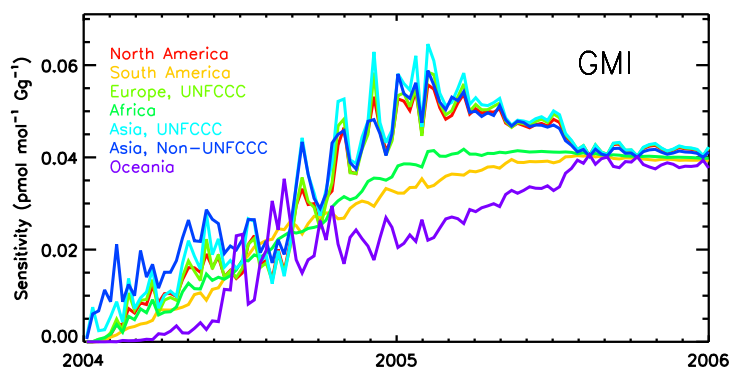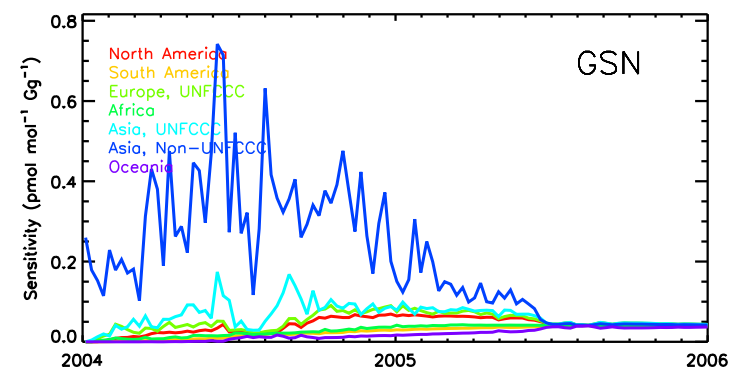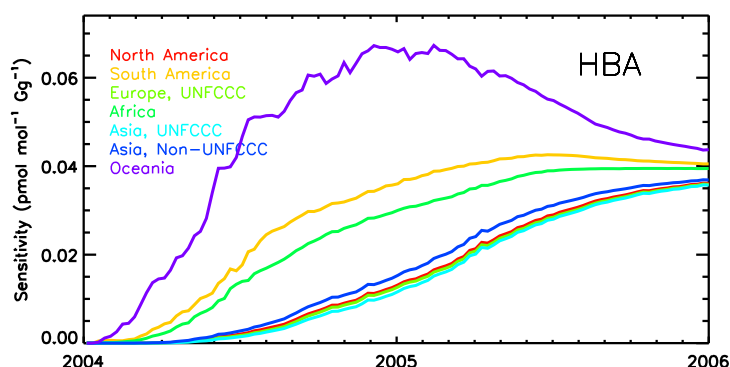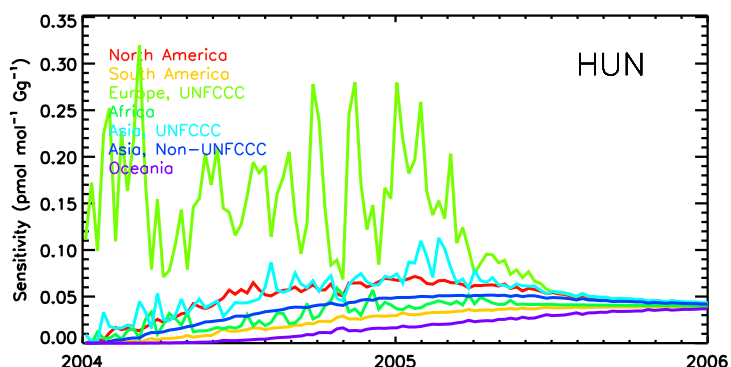



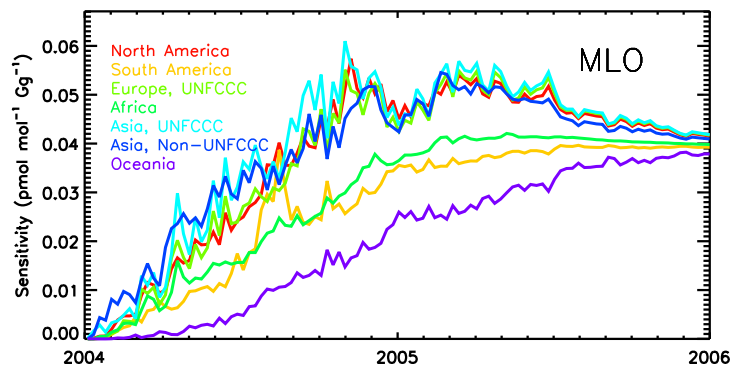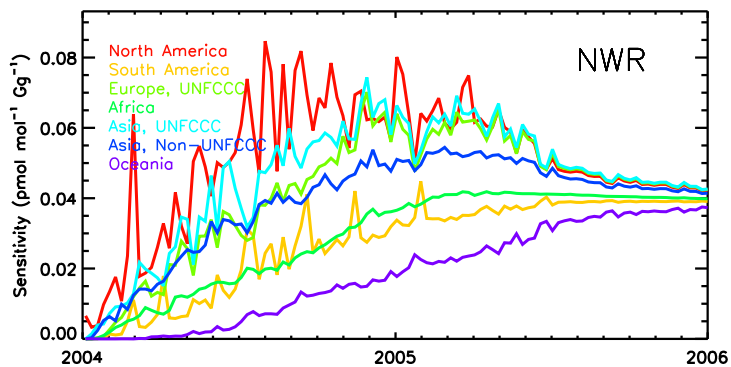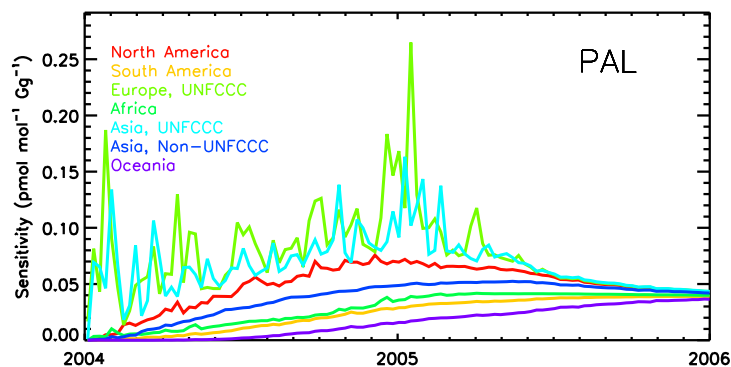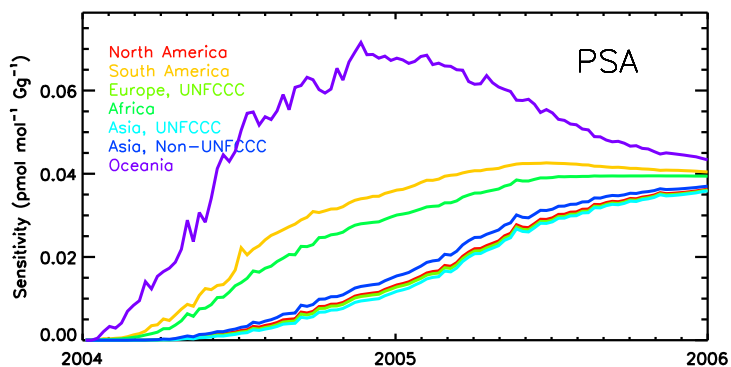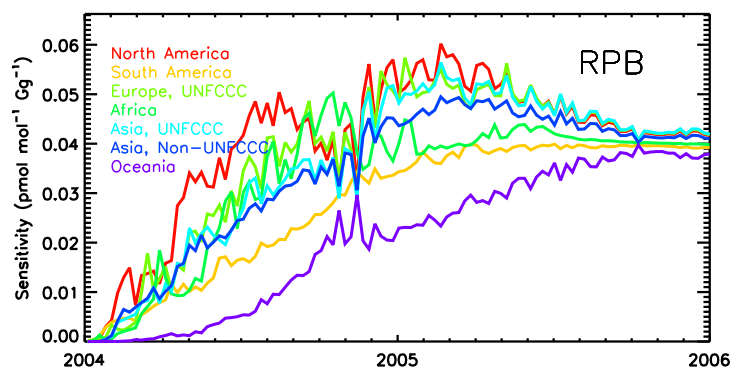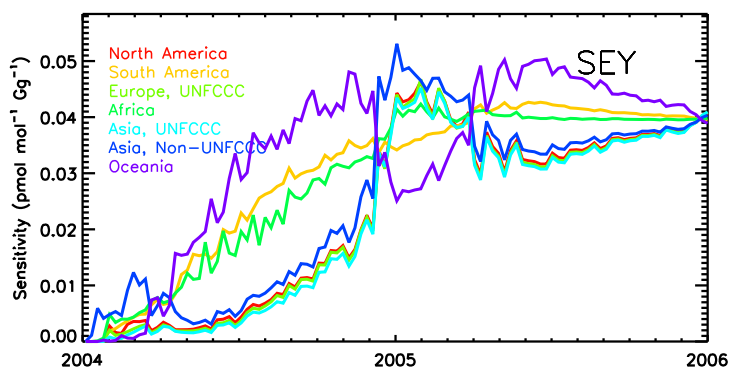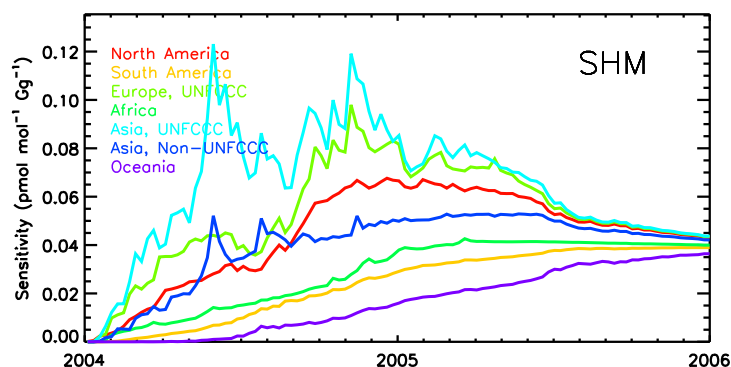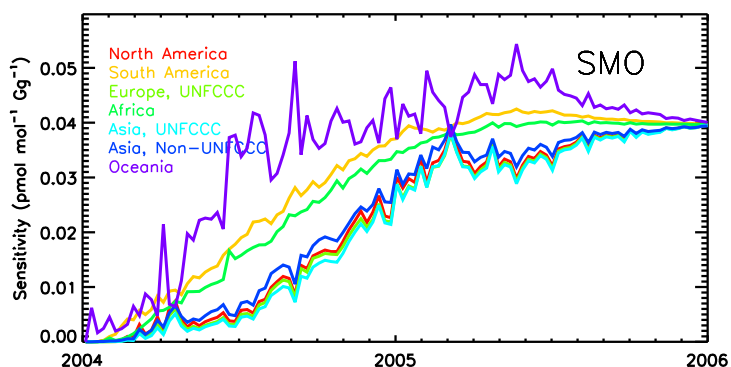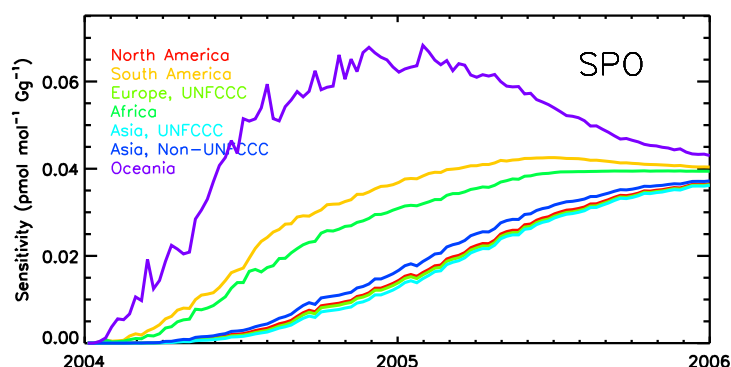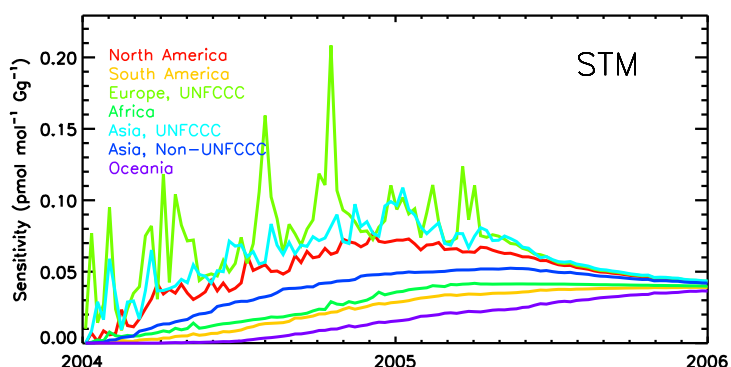

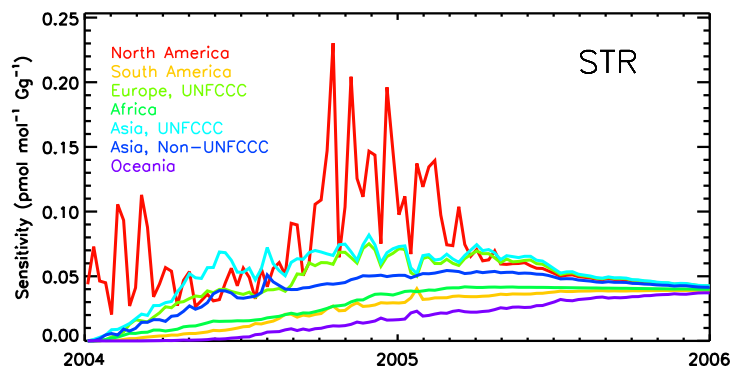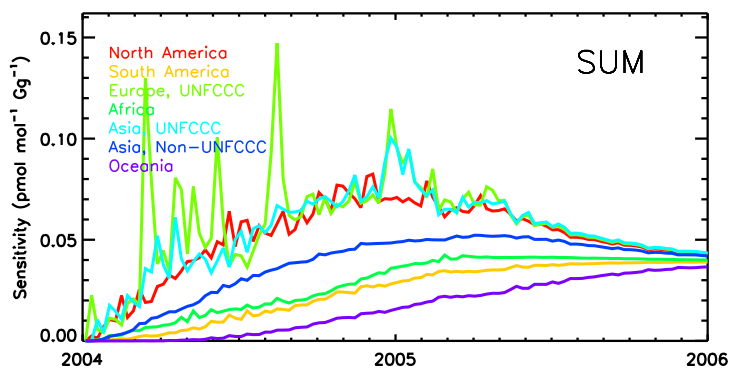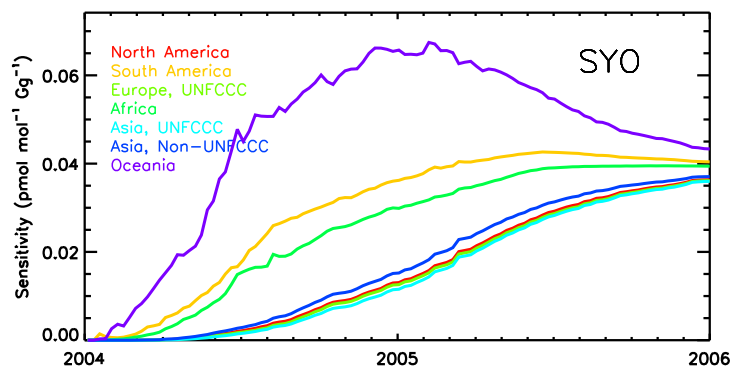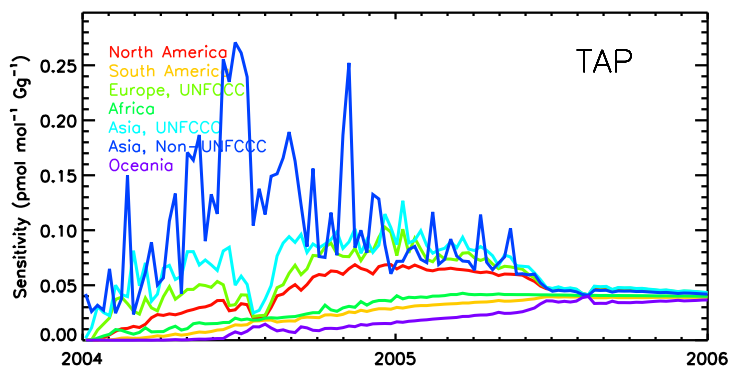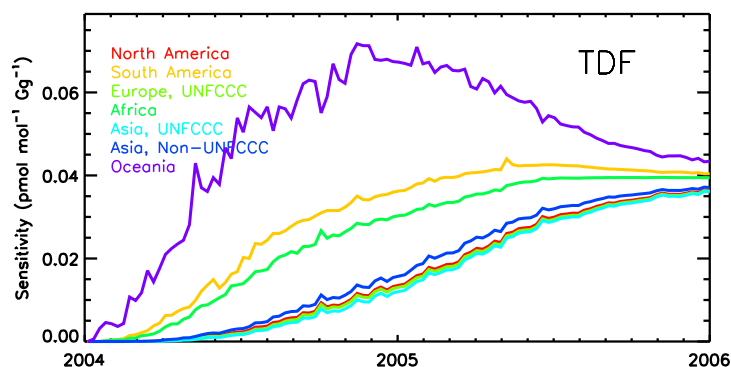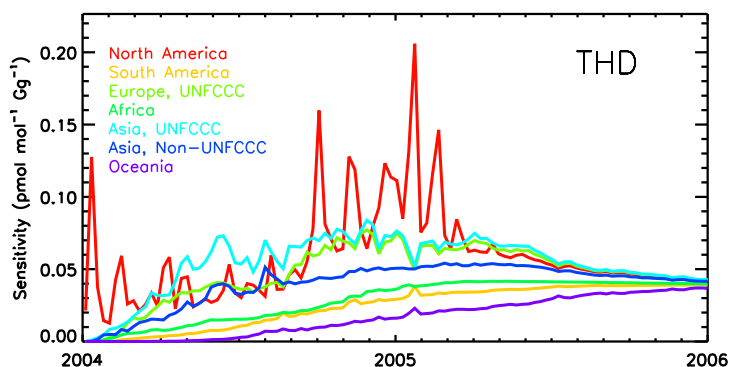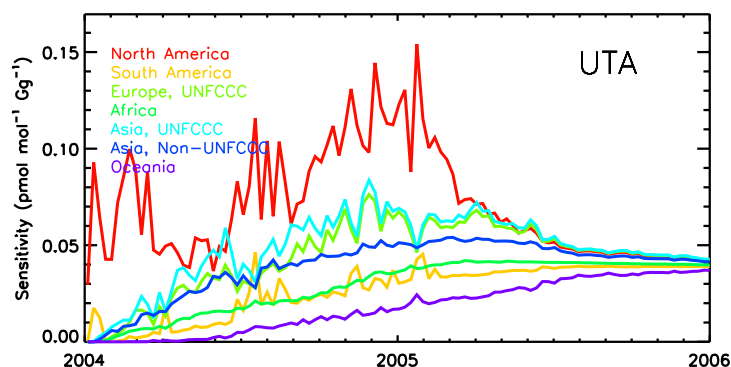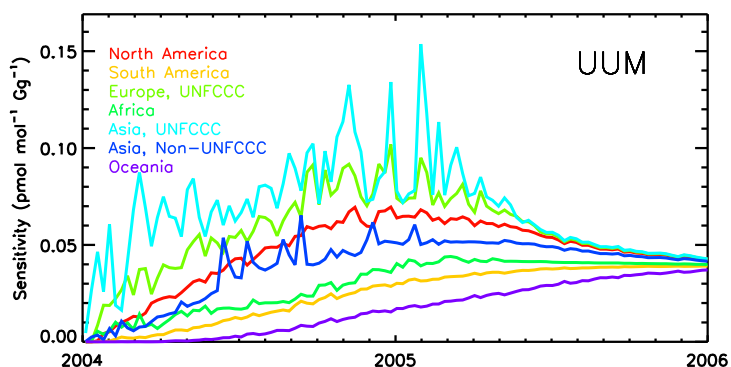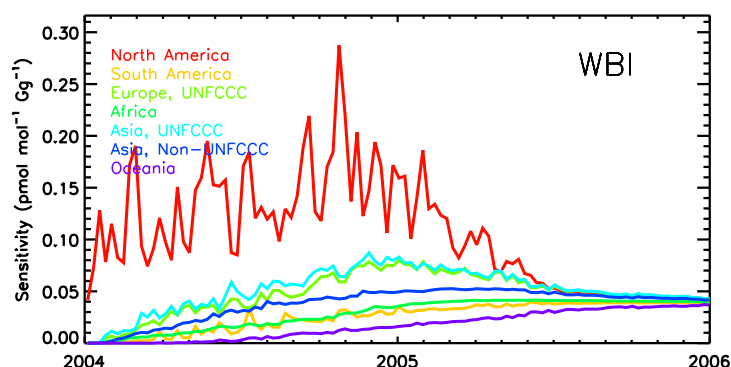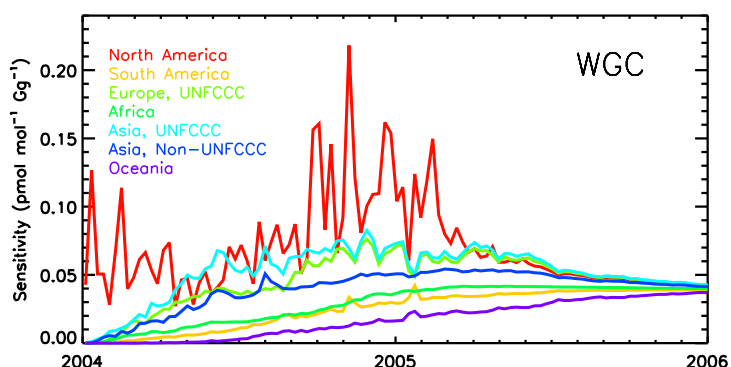



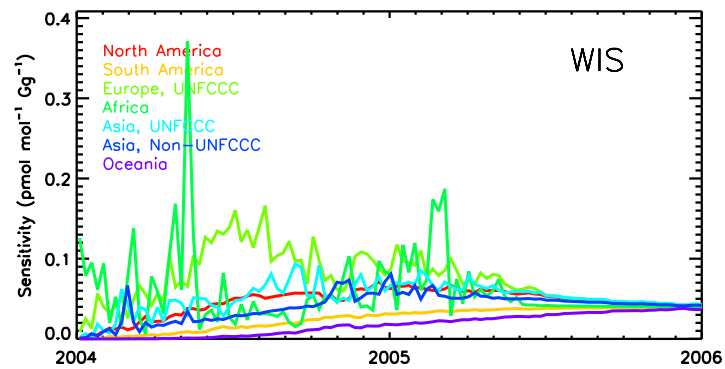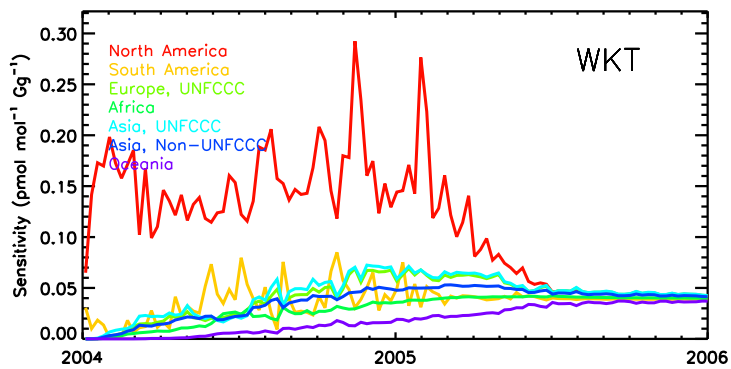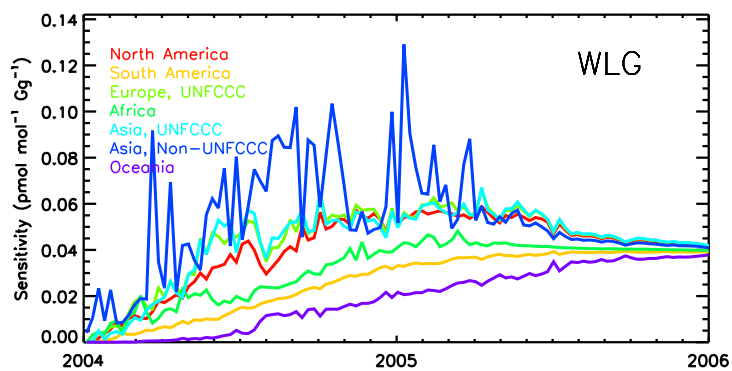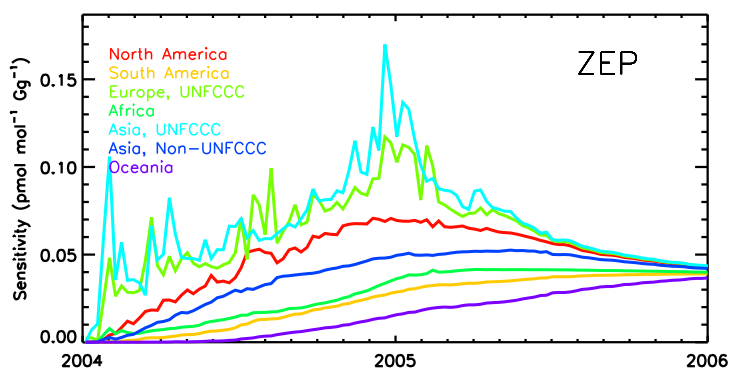

Supplement: Supplementary file 1 [file acp-10-10305-2010-supplement.zip]

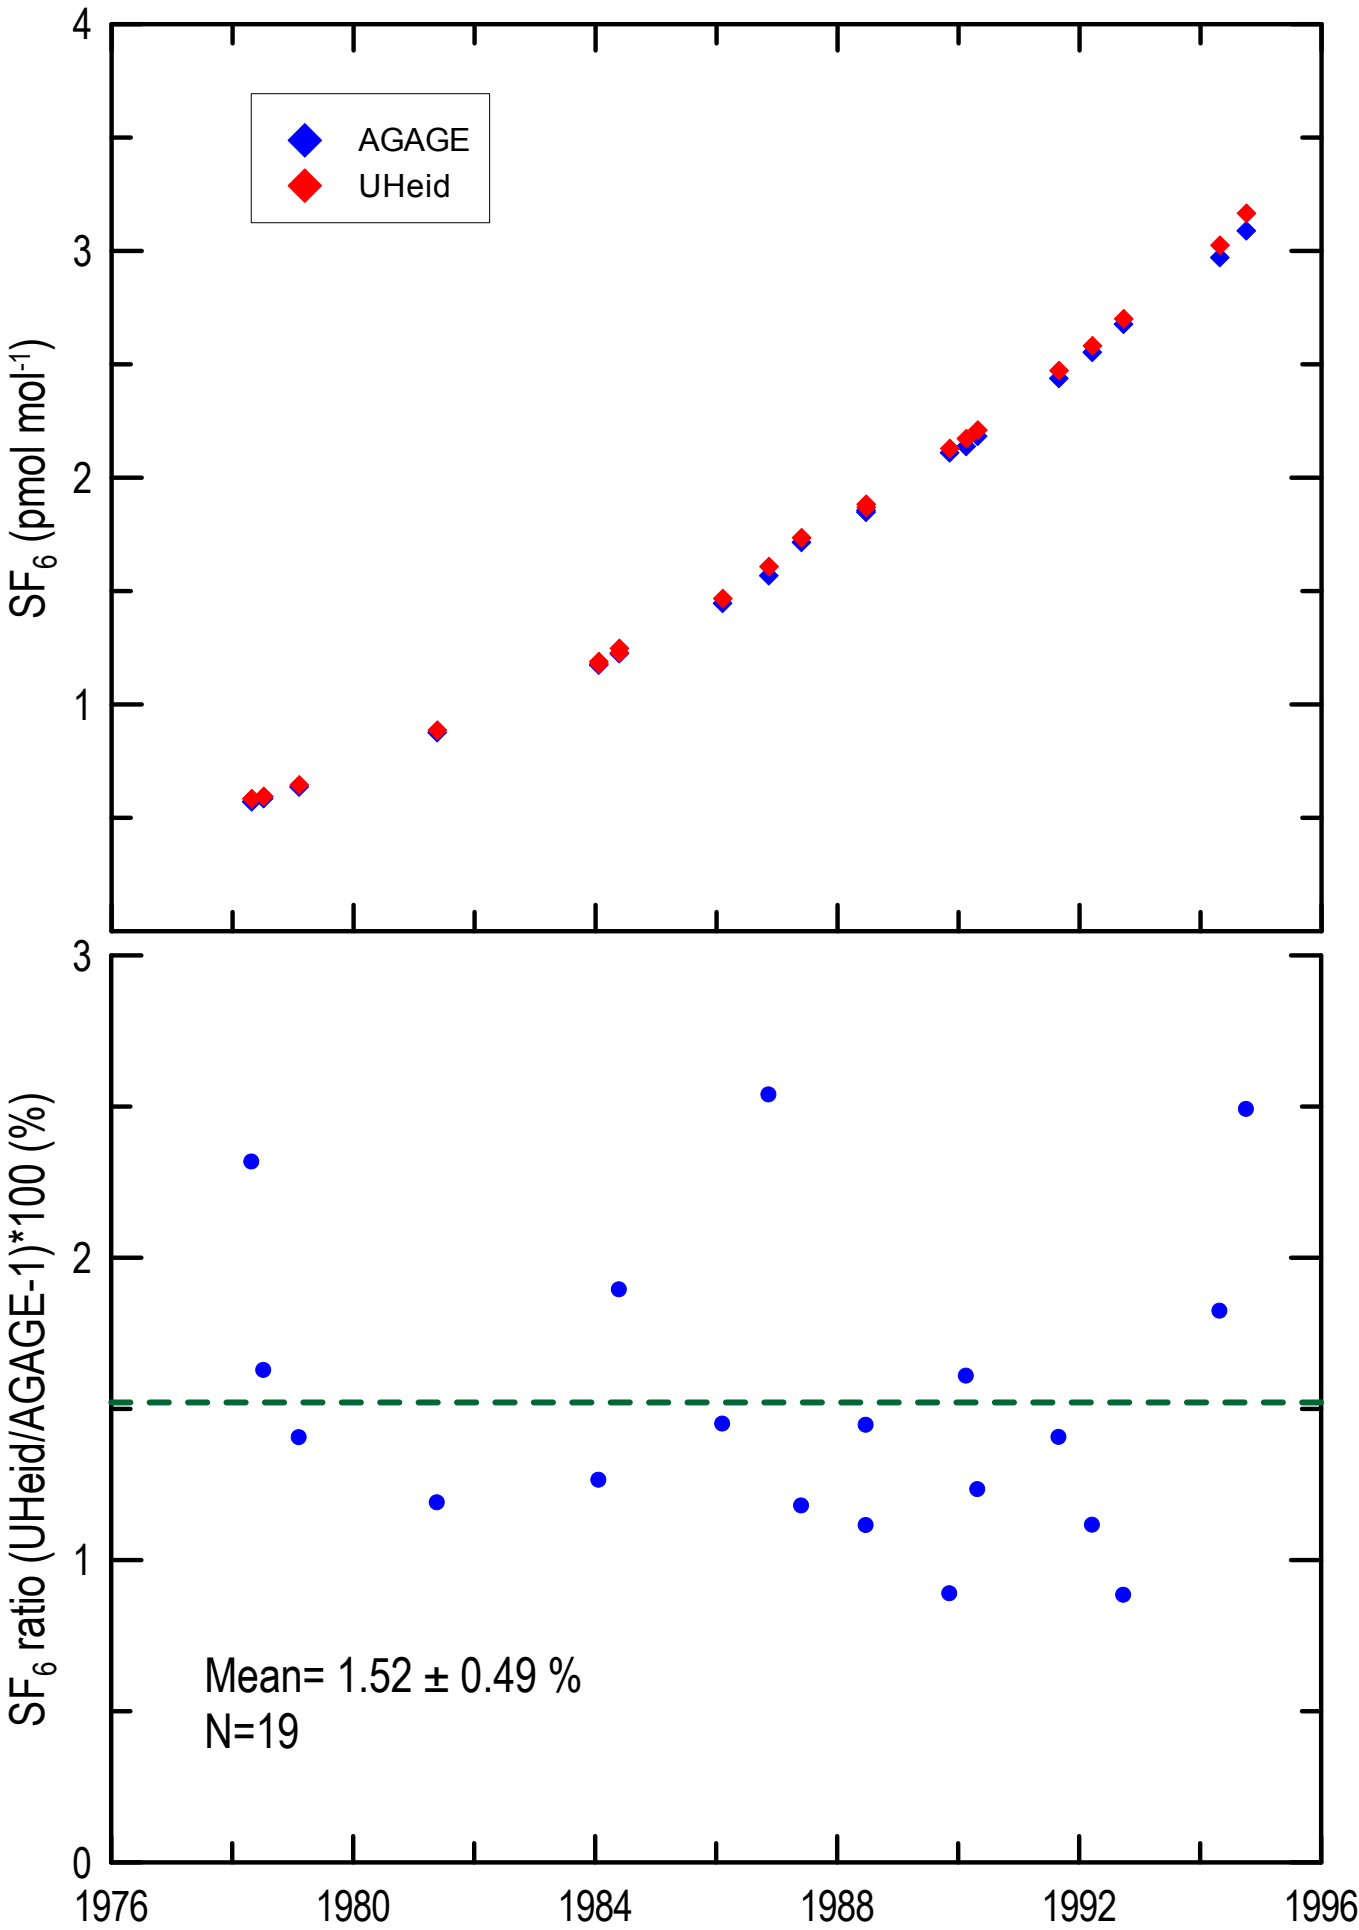

Supplement: Supplementary file 2 [file acp-10-10305-2010-supplement.zip]

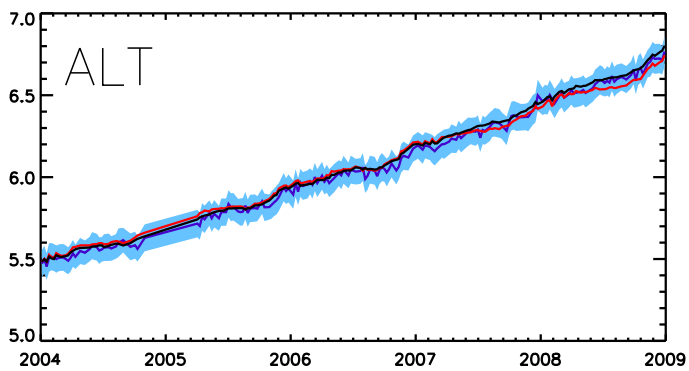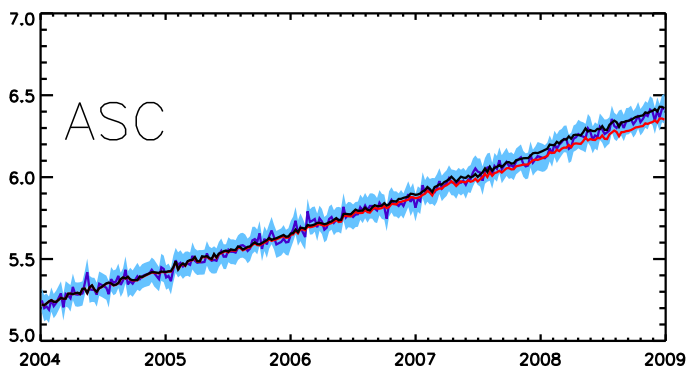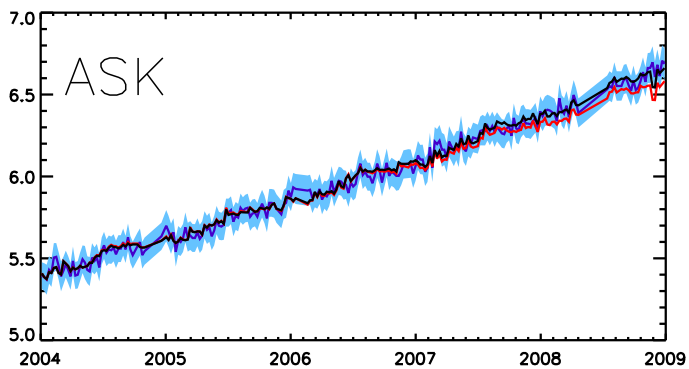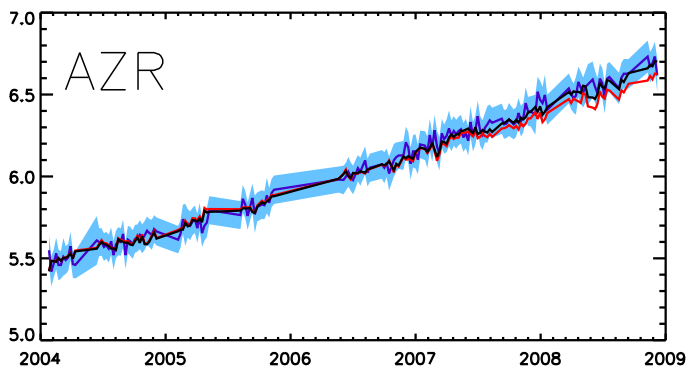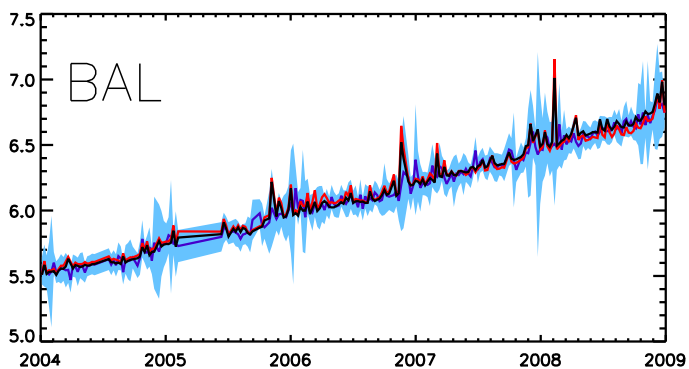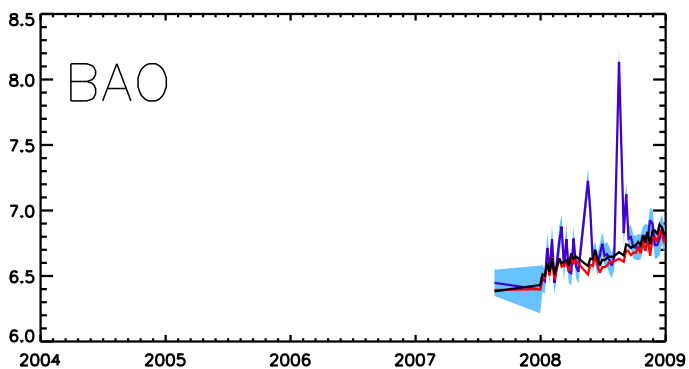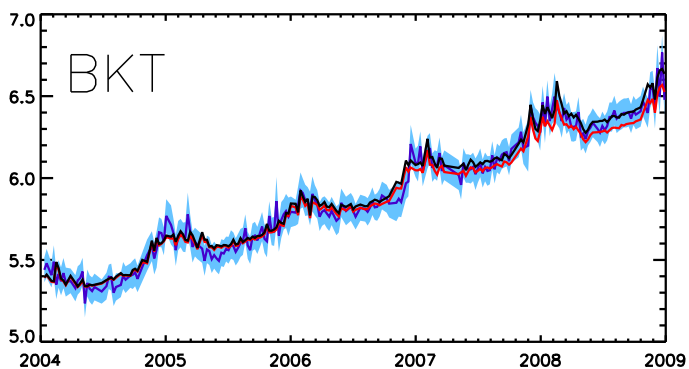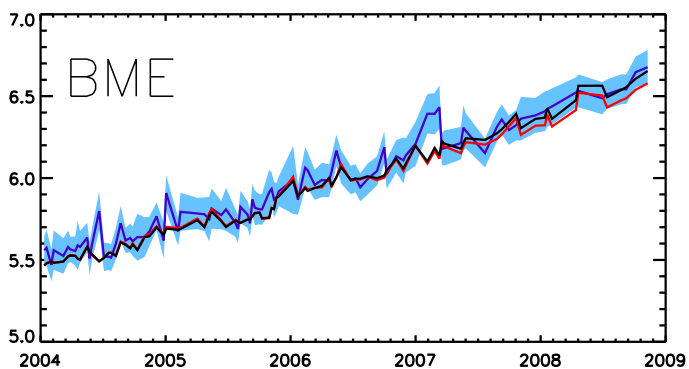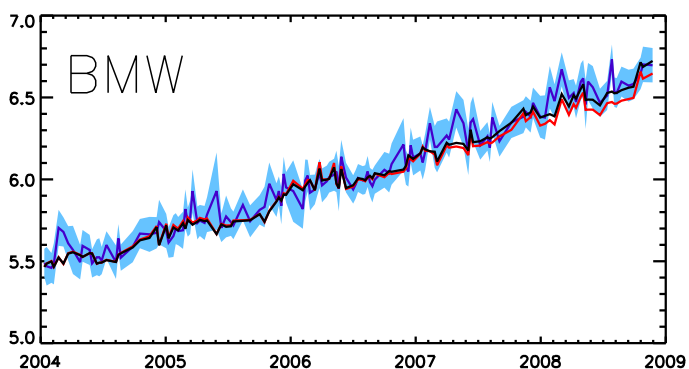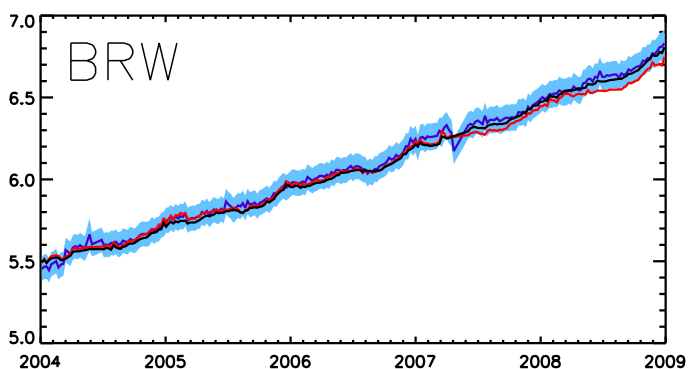

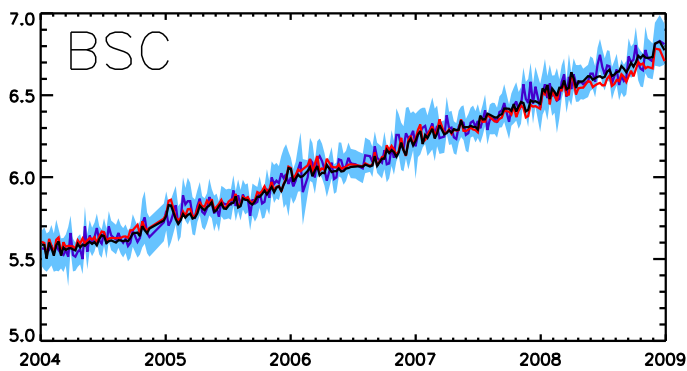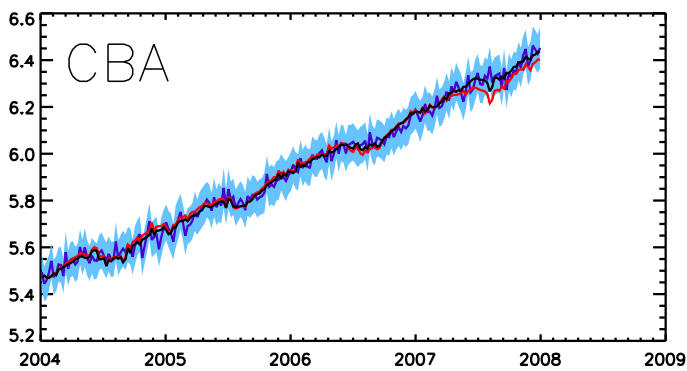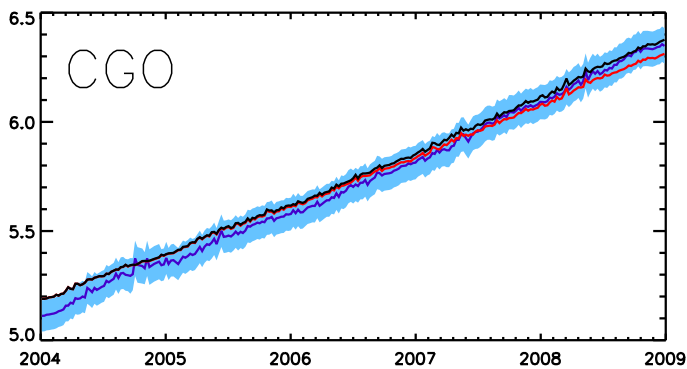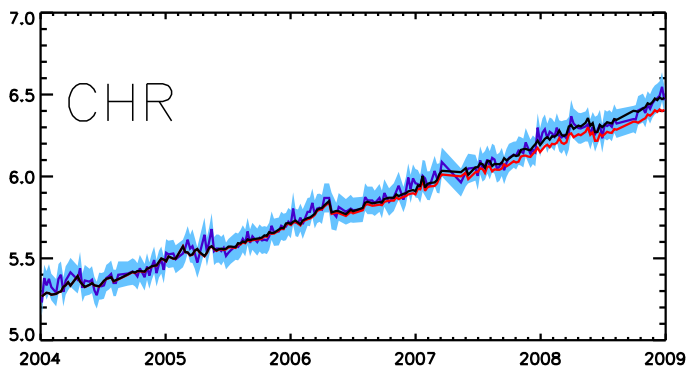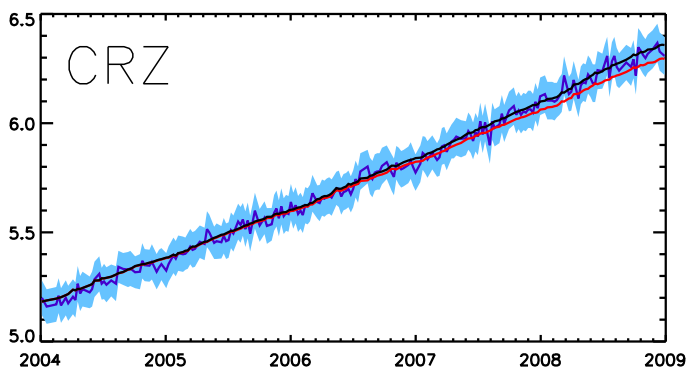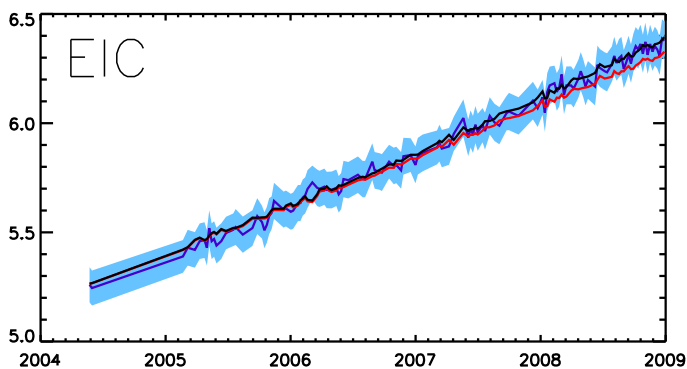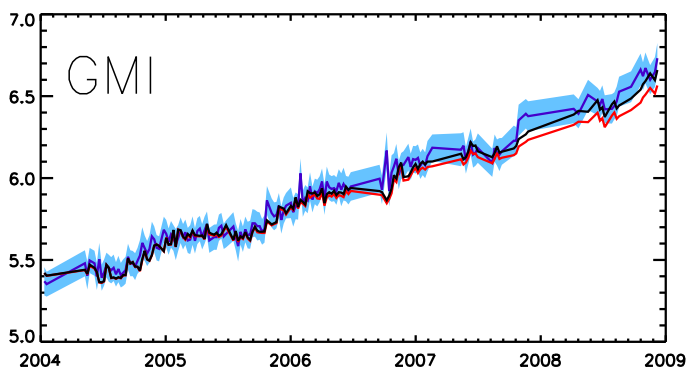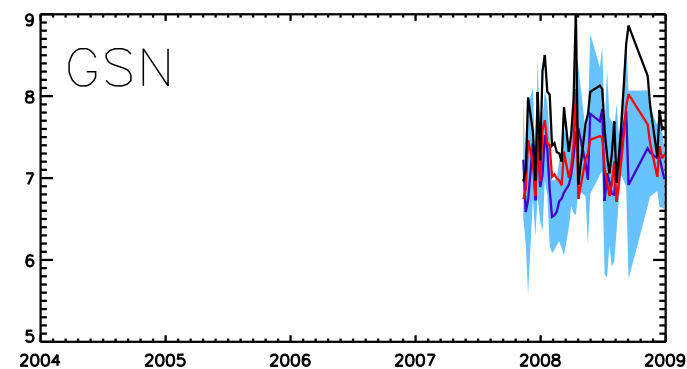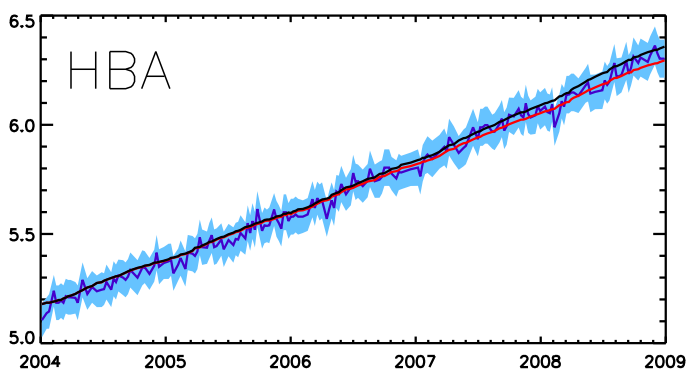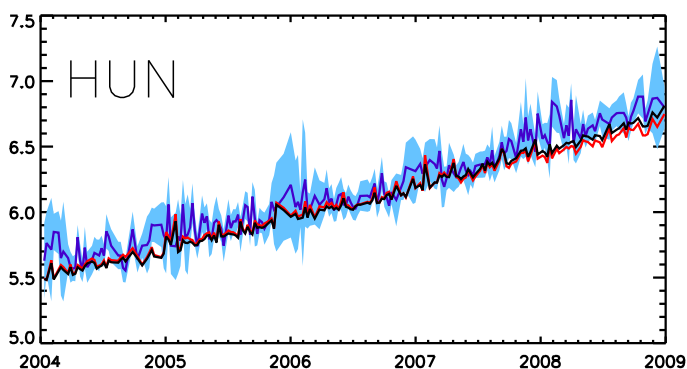

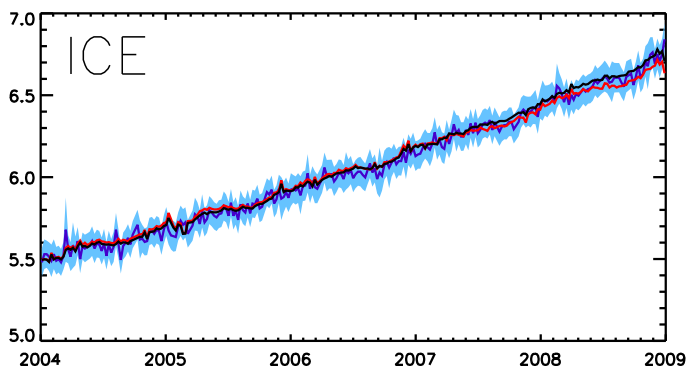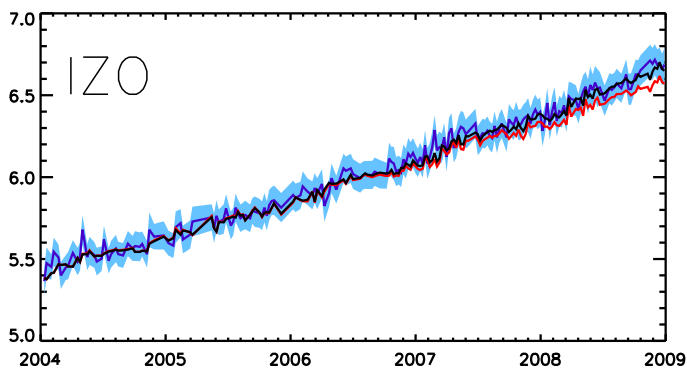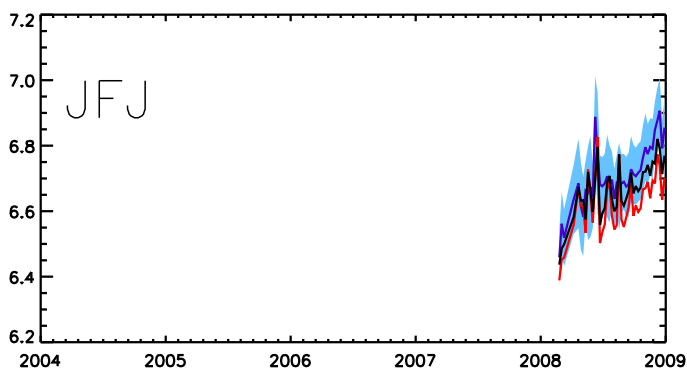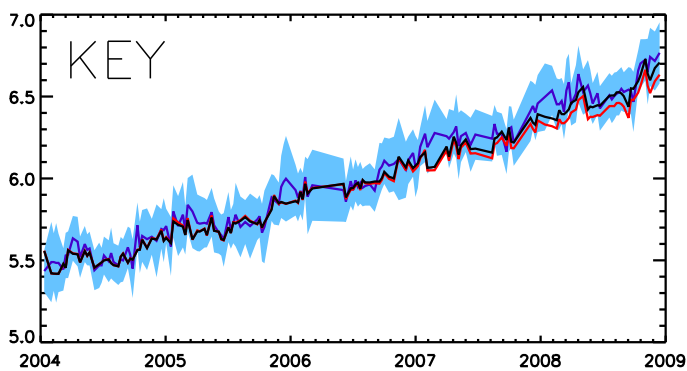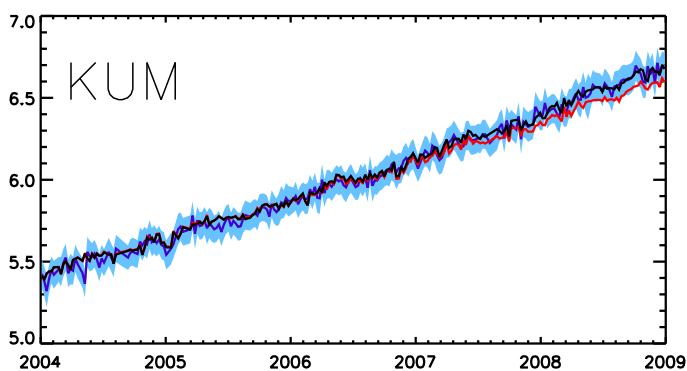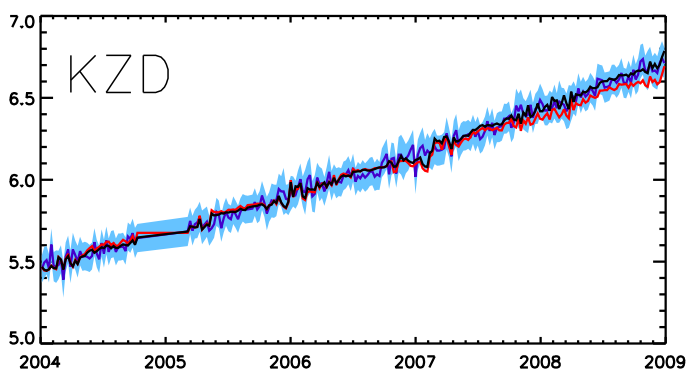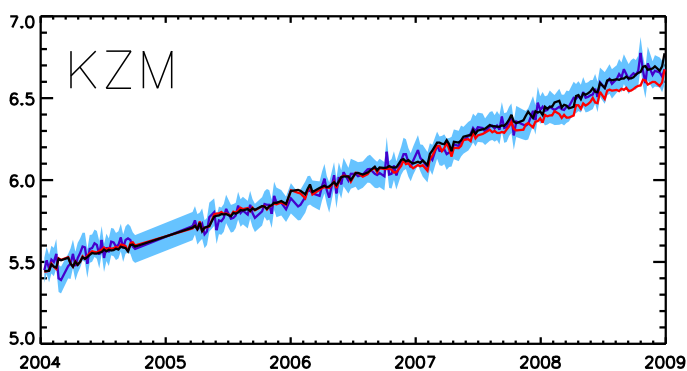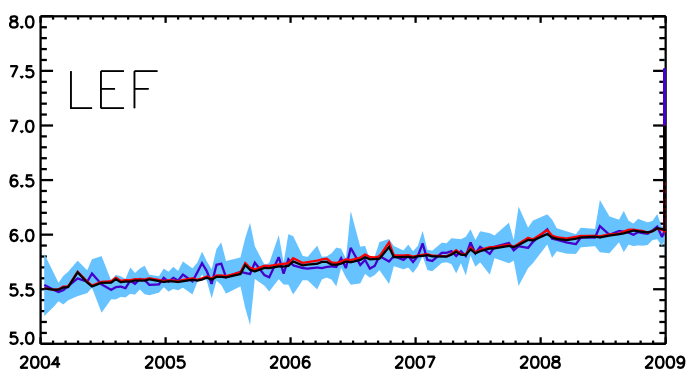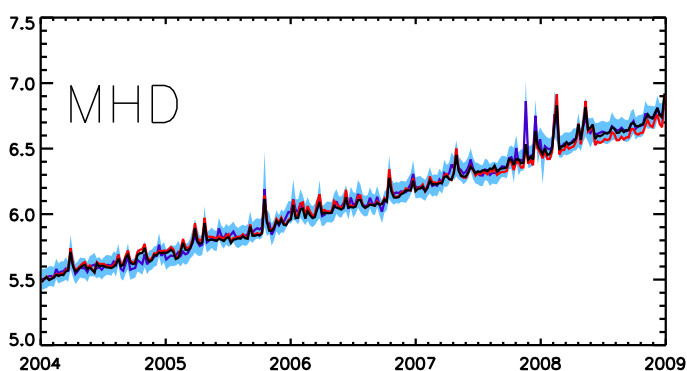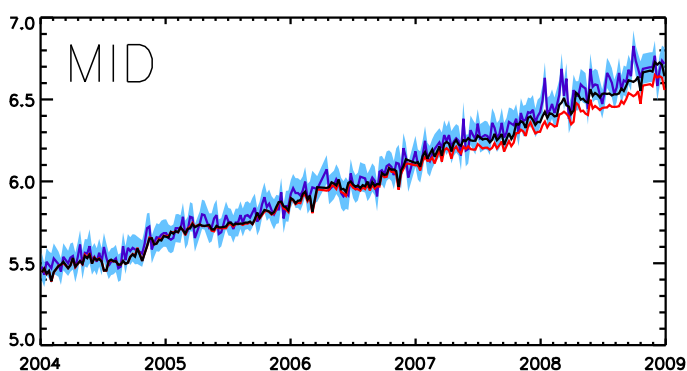

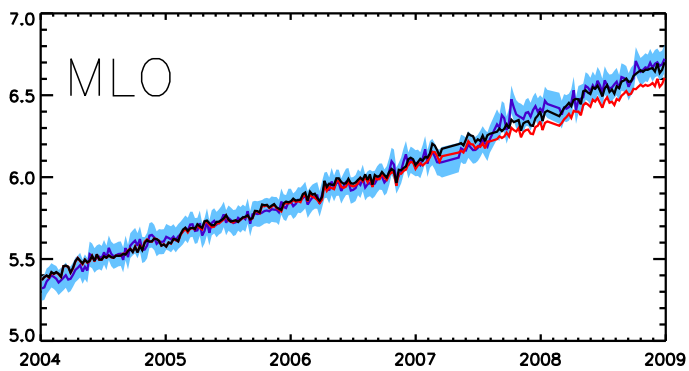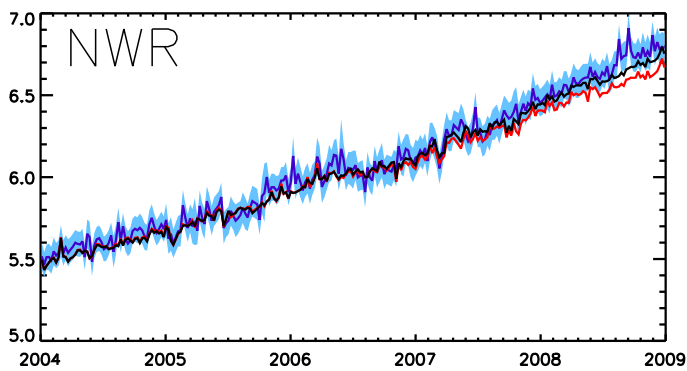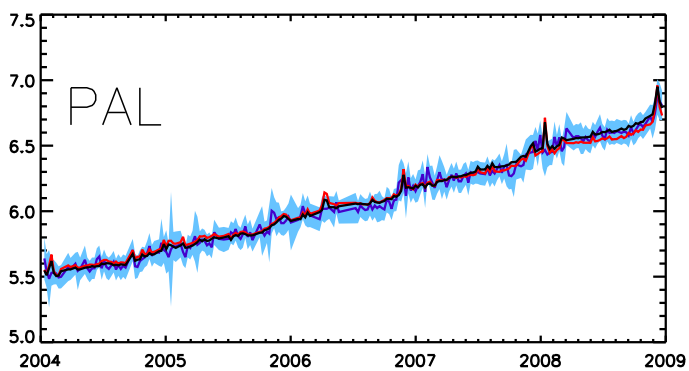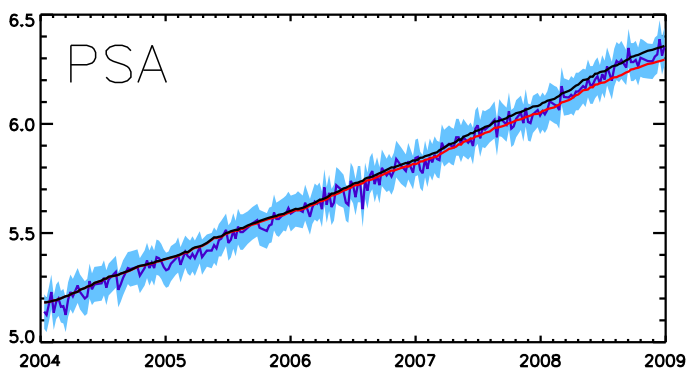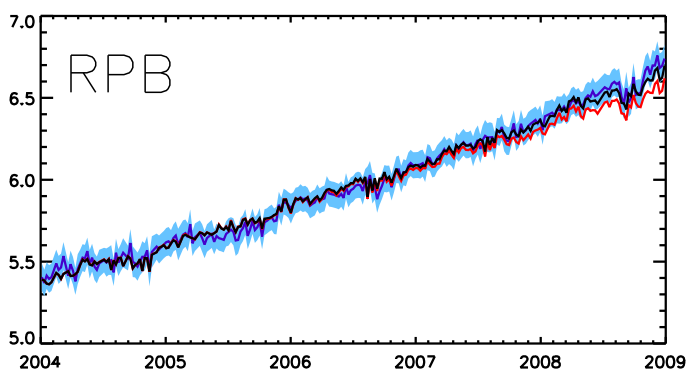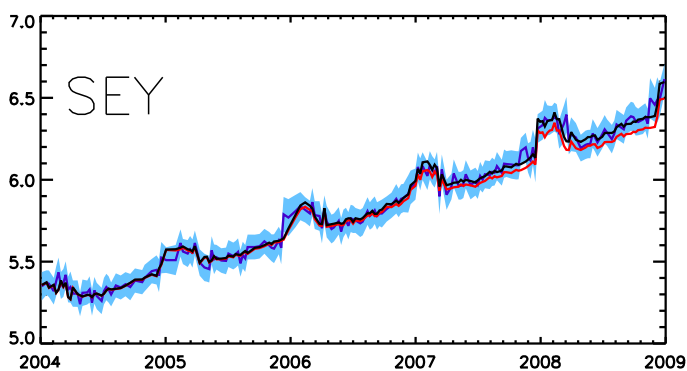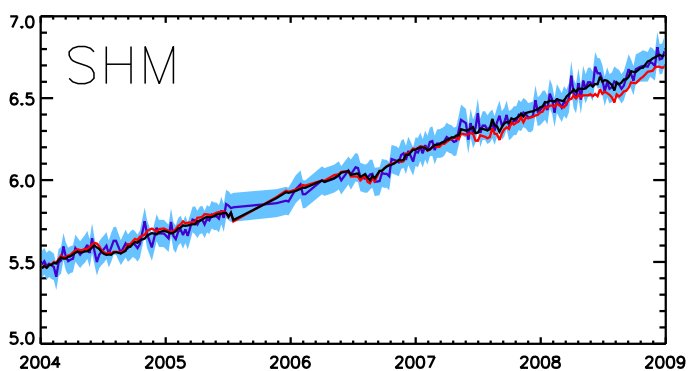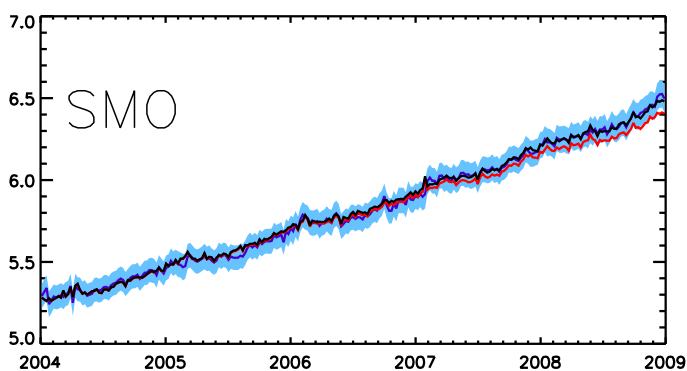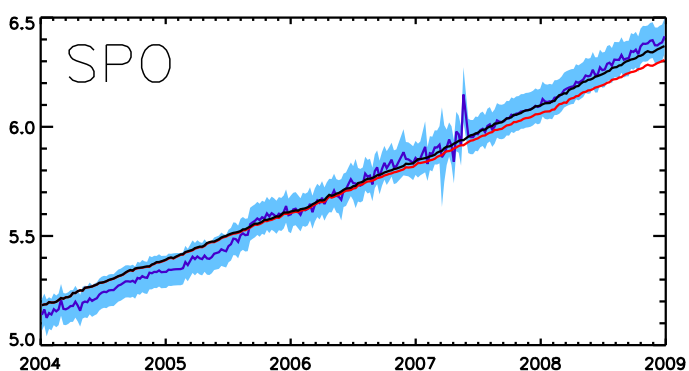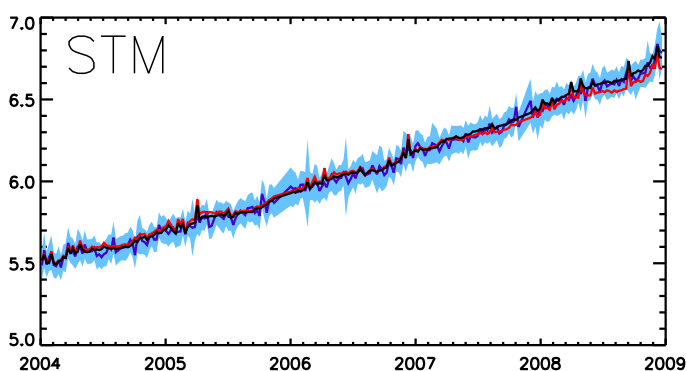

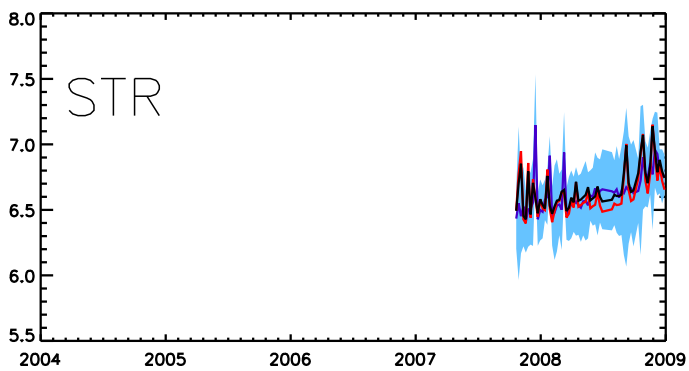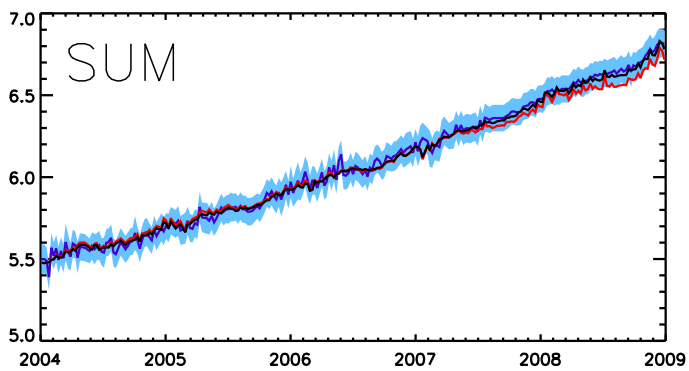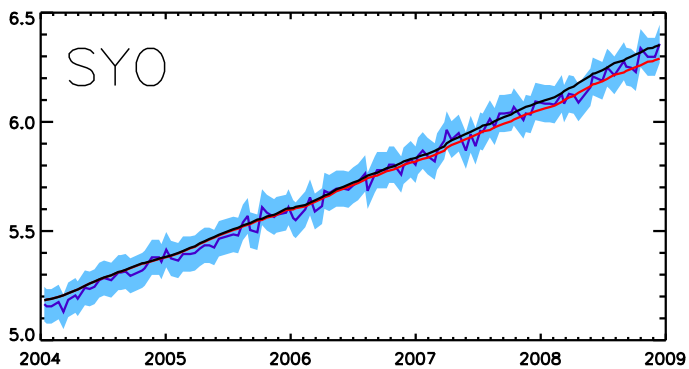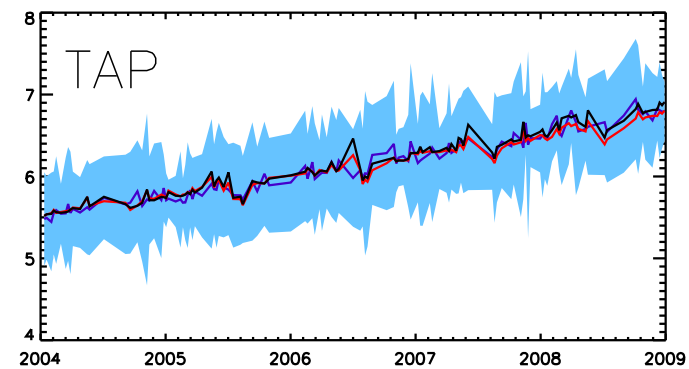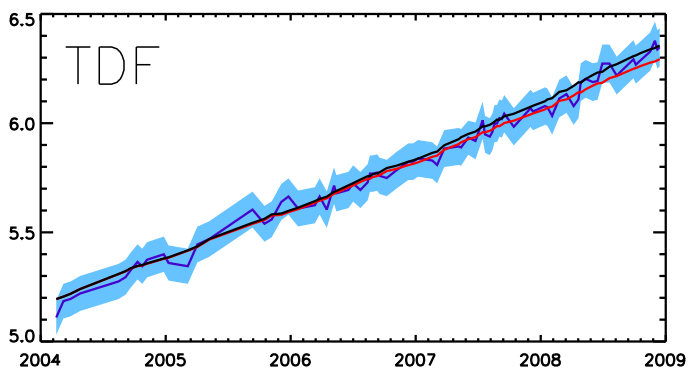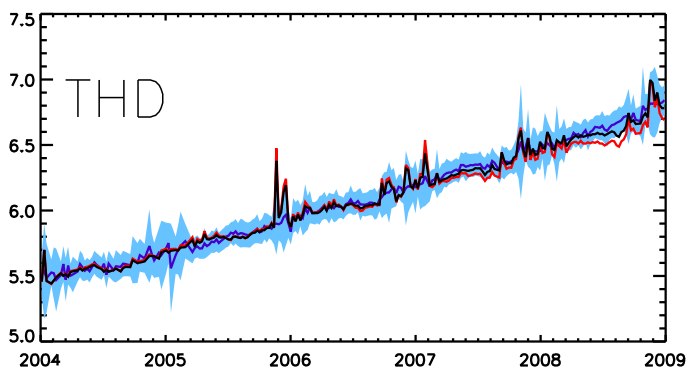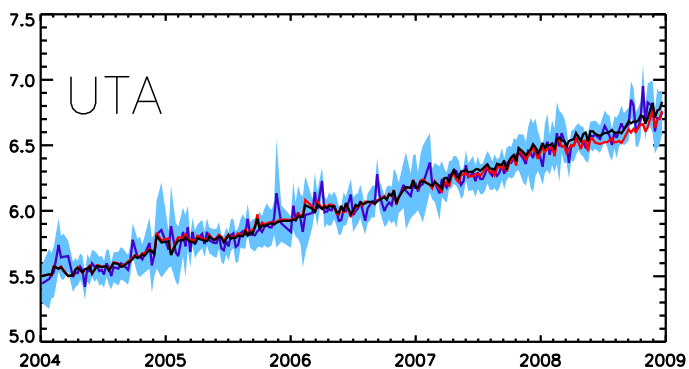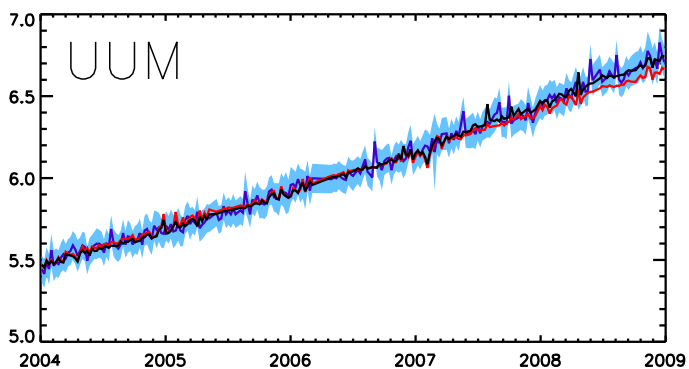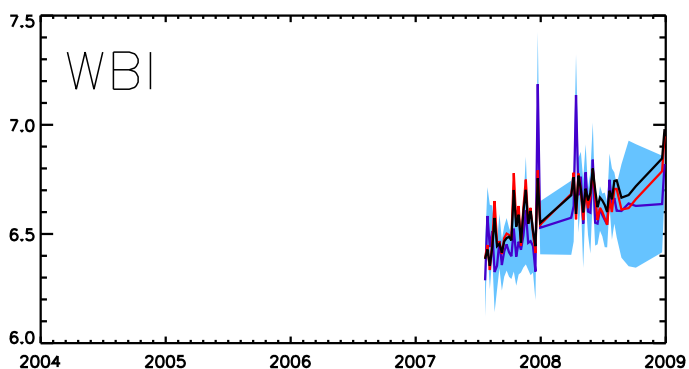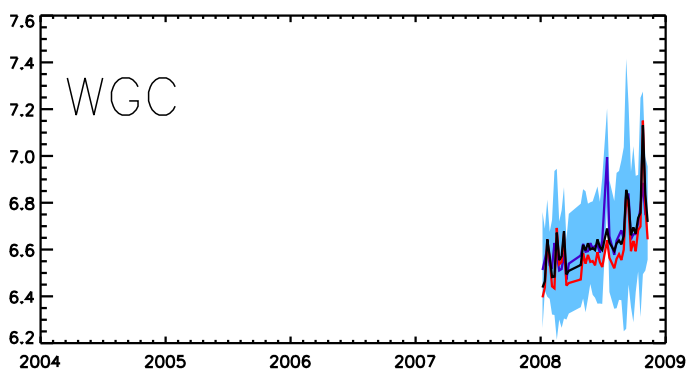

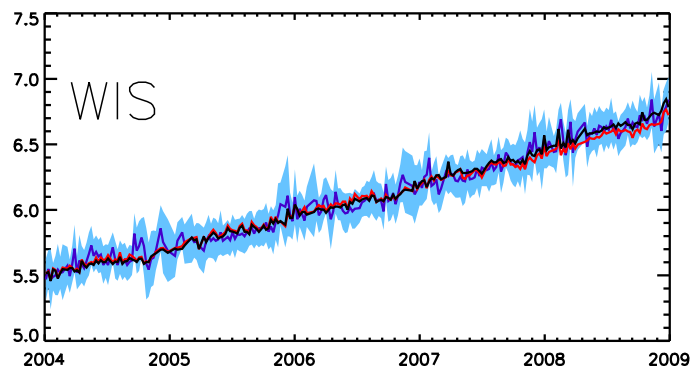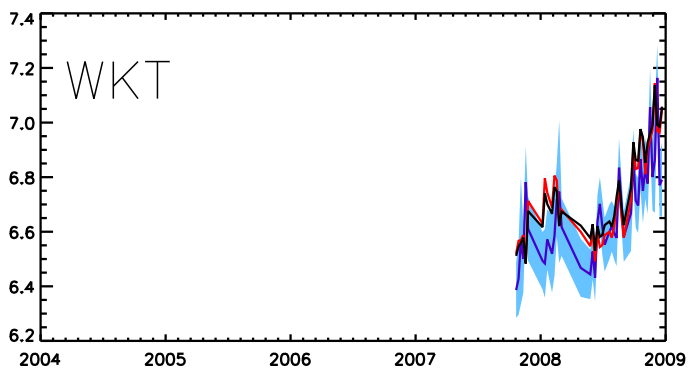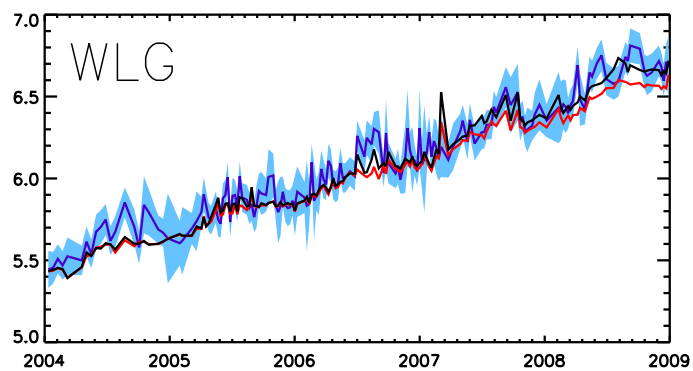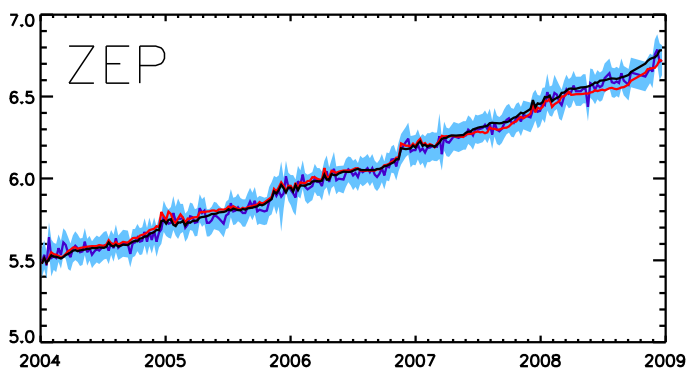

Supplement: Supplementary file 3 [file acp-10-10305-2010-supplement.zip]
